# Supplementary figures and images for: Mitochondrial genomes of twelve species of hyperdiverse Trigonopterus weevils
Source: PeerJ journal article supplement (doi:10.7717/peerj.10017), 2020-10-13

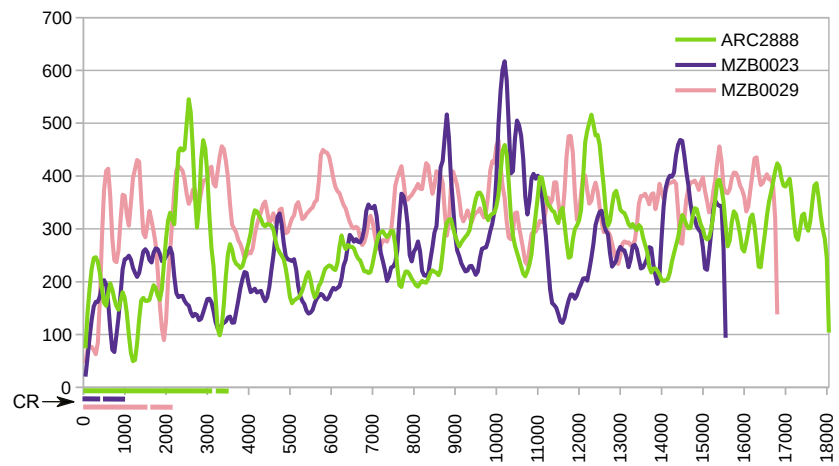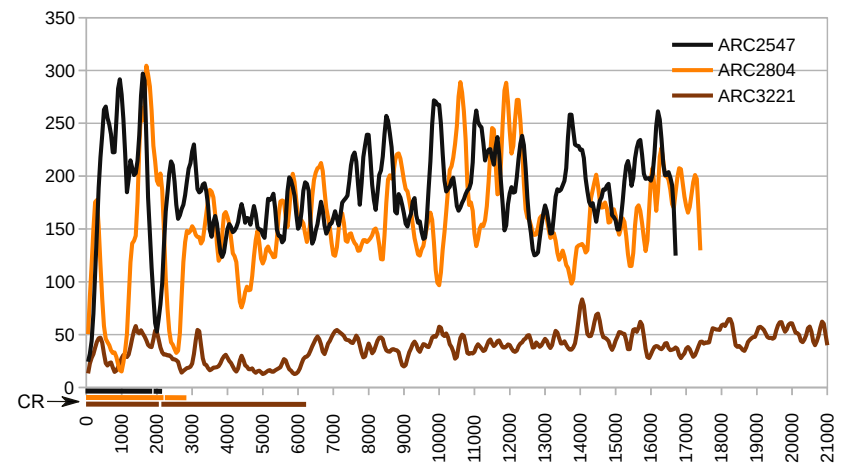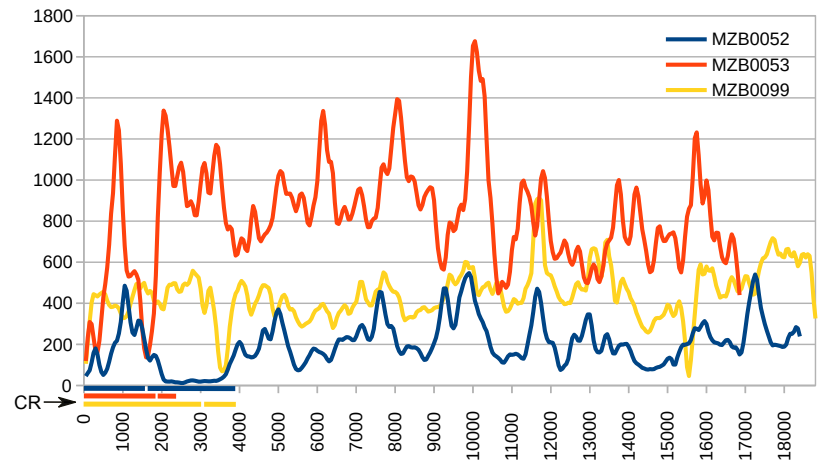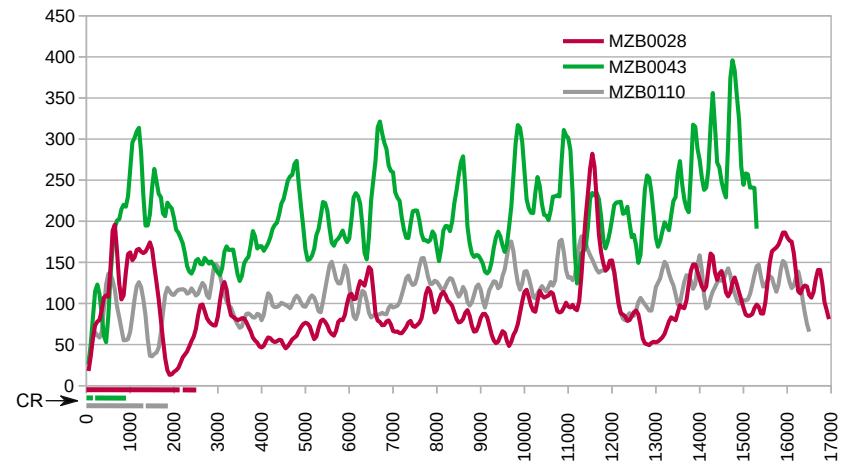

Supplement: Suppl_Fig1_rev2.pdf [file Suppl_Fig1_rev2.pdf]
